# Supplementary material for: Management of post-traumatic non-iatrogenic lumbar/flank hernias: diagnosis and treatment options—systematic review, meta-analysis and management algorithm
Source: Springer Nature journal article supplement (doi:10.1007/s10029-025-03281-3), 2025-02-14
Supplement: MOESM1 [file 10029_2025_3281_MOESM1_ESM.pdf]

| STUDY YEAR | AUTHORS                 | NUMBER OF CASES | MINORS SCORE | Diagnostic method | Associated Injuries                                                                                                                                                                                                             | FLANK HEMATOMA OR SEATBELT SIGN % | HERNIA SITE                       | TIME OF DIAGNOSIS | REPAIR TYPE                                          | TIME OF REPAIR                                     |
|------------|-------------------------|-----------------|--------------|-------------------|---------------------------------------------------------------------------------------------------------------------------------------------------------------------------------------------------------------------------------|-----------------------------------|-----------------------------------|-------------------|------------------------------------------------------|----------------------------------------------------|
| 1990       | Faro                    | 7               | 6            | CT                |                                                                                                                                                                                                                                 | 42.9%                             | INFERIOR (7)                      | AT PRESENTATION   | -                                                    | ACUTE (2)<br>ELECTIVE (1)<br>OTHERS- NOT REPAIRED. |
| 1993       | Rehm and Ross           | 1               | 6            |                   | Repair during Ex-lap; Bowel protrusion and demucosalization                                                                                                                                                                     | 100                               | SUPERIOR                          | AT PRESENTATION   | OPEN PRIMARY REPAIR                                  | ACUTE                                              |
| 1994       | Damschen                | 5               | 6            | CT                | <b>1. Ruptured ileum – ex-lap</b><br><b>2. Liver laceration – ex-lap</b><br>3. 5-yr old boy – no other injuries<br><b>4. Small defect, no associated injuries – conservative</b><br>5. Hemodynamically stable - <b>Elective</b> | -                                 | INFERIOR (5)                      | AT PRESENTATION   | OPEN PRIMARY REPAIR                                  | ACUTE (3)<br>ELECTIVE (1)<br>CONSERVATIVE (1)      |
| 1994       | Esposito & Fedorak      | 1               | 6            | CT                | <b>Large defect</b> – bowel herniation (Ex-lap) -                                                                                                                                                                               | 100                               | DIFFUSE                           | AT PRESENTATION   | OPEN MESH (BONE-ANCHORED)                            | ACUTE                                              |
| 1995       | Burick and Parascandola | 1               | 6            | CT                | Hemodynamically stable – no intraabdominal injury (3cm defect size)                                                                                                                                                             | -                                 | SUPERIOR                          | AT PRESENTATION   | LAP MESH                                             | ACUTE                                              |
| 1996       | McCarthy and Lemmon     | 1               | 6            | CT                | Colonic deserosalization, Polytraumatized – ex lap                                                                                                                                                                              | 100                               | SUPERIOR                          | AT PRESENTATION   | OPEN PRIMARY REPAIR                                  | ACUTE                                              |
| 1998       | Zamir                   | 1               | 6            | CT                | Previous ex-lap. PTFE mesh used.                                                                                                                                                                                                | 100                               | -                                 | MISSED            | OPEN MESH REPAIR                                     | ELECTIVE                                           |
| 1999       | Balkan                  | 1               | 8            | CT                | Ex-lap; Bowel injury                                                                                                                                                                                                            | 100                               | -                                 | AT PRESENTATION   | OPEN PRIMARY REPAIR                                  | ACUTE                                              |
| 2000       | Killeen                 | 15              | 8            | CT                | - Case by case details unavailable                                                                                                                                                                                              | 100                               | INFERIOR (14)<br><br>SUPERIOR (1) | AT PRESENTATION   | OPEN PRIMARY REPAIR (3)<br><br>OPEN MESH REPAIR (12) | ACUTE (3)<br>ELECTIVE (12)                         |

|      |           |    |    |     |                                                                                                                                                                                                                                                                                                                                                          |       |          |                 |                                   |                           |
|------|-----------|----|----|-----|----------------------------------------------------------------------------------------------------------------------------------------------------------------------------------------------------------------------------------------------------------------------------------------------------------------------------------------------------------|-------|----------|-----------------|-----------------------------------|---------------------------|
| 2001 | Lukan     | 2  | 10 | CT  | 1. Ex lap; large defect; no intra-abdominal injury – extraperitoneal PTFE mesh<br>2. No other injuries; elective; intact peritoneum                                                                                                                                                                                                                      | -     | -        | AT PRESENTATION | OPEN MESH (1)<br>OPEN PRIMARY (1) | ACUTE (1)<br>ELECTIVE (1) |
| 2001 | Berne     | 1  | 6  | CT  | -                                                                                                                                                                                                                                                                                                                                                        | -     | DIFFUSE  | MISSED          | OPEN MESH REPAIR (BONE ANCHORED)  | ELECTIVE                  |
| 2002 | Borens    | 1  | 8  | MRI | Late stable presentation, no intraabdominal complication                                                                                                                                                                                                                                                                                                 | -     | -        | MISSED          | OPEN MESH REPAIR                  | ELECTIVE                  |
| 2002 | Hickey    | 15 | 6  | CT  | -                                                                                                                                                                                                                                                                                                                                                        | -     |          |                 | -                                 | -                         |
| 2003 | Jarrah    | 1  | 6  | CT  | Intact peritoneum, adipose herniation, late presentation (at risk of abdominal contamination)                                                                                                                                                                                                                                                            | -     | INFERIOR | MISSED          | OPEN PRIMARY REPAIR               | ELECTIVE                  |
| 2003 | Shuhaiber | 1  | 6  | CT  | Potential risk of abdominal contamination; ex-lap with UPJ repair                                                                                                                                                                                                                                                                                        | -     | -        | AT PRESENTATION | OPEN PRIMARY REPAIR               | ACUTE                     |
| 2004 | Burt      | 3  | 8  | CT  | 1. Elective hernia repair; large defect 10cm; no risk of abdominal contamination - Preperitoneal Mersilene mesh<br>2. Elective hernia repair; large defect 10cm; no risk of abdominal contamination - Preperitoneal Mersilene mesh<br>3. Initial splenectomy followed by incisional hernia plus late diagnosed LFH. Preperitoneal mersilene mesh repair. | 33.3% | -        | MISSED          | OPEN MESH                         | ELECTIVE                  |
| 2004 | Carbonell | 3  | 8  | CT  | Late diagnosed, electively repaired hernias. PTFE mesh in all.                                                                                                                                                                                                                                                                                           | -     | INFERIOR | MISSED          | OPEN MESH REPAIR (BONE ANCHORED)  | ELECTIVE                  |

|      |          |    |    |                           |                                                                                                                                   |     |          |                                       |                                                                               |                                |
|------|----------|----|----|---------------------------|-----------------------------------------------------------------------------------------------------------------------------------|-----|----------|---------------------------------------|-------------------------------------------------------------------------------|--------------------------------|
| 2006 | Madan    | 1  | 8  | CT                        | LFH repaired with open mesh (Gore-Tex). Recurrent hernia repaired in a stable patient with laparoscopic mesh (PTFE).              |     | -        | AT PRESENTATION                       | LAP MESH                                                                      | ACUTE                          |
| 2007 | DiCarlo  | 1  | 8  | CT                        | -                                                                                                                                 | -   | -        | AT PRESENTATION                       | LAP MESH                                                                      | ACUTE                          |
| 2007 | Iannitti | 1  | 6  | CT                        | Late presentation; minimal risk of abdominal contamination; lap mesh repair with extraperitoneal Kugel mesh                       | -   | -        | MISSED                                | LAP MESH                                                                      | ELECTIVE                       |
| 2008 | Hsu      | 3  | 10 | CT                        | -                                                                                                                                 | 100 | -        | AT PRESENTATION                       | OPEN PRIMARY REPAIR                                                           | ACUTE                          |
| 2008 | Bender   | 25 | 10 | CT (23), EVISCERATION (2) | All patients with large defects – Open mesh repair<br><br>All patients with risk of abdominal contamination – Open primary repair |     |          | AT PRESENTATION<br><br>MISSED         | OPEN MESH REPAIR (18)<br><br>OPEN PRIMARY REPAIR (4)<br><br>NON OPERATIVE (3) | ACUTE (17)<br><br>ELECTIVE (5) |
| 2008 | Torer    | 1  | 10 | CT                        | Bowel injury (ischemia); large defect -10cm; repair with PTFE mesh                                                                | 100 | -        | AT PRESENTATION                       | OPEN MESH REPAIR                                                              | ACUTE                          |
| 2008 | Uzun     | 1  | 10 | CT, USS                   | Large -10cm hernia; repaired acutely with polypropylene mesh                                                                      | 100 | -        | AT PRESENTATION                       | -                                                                             | ACUTE                          |
| 2008 | Valusek  | 1  | 8  | CT                        | Pediatric patient; large sized defect. Ex-lap; associated bowel injury                                                            | 100 | -        | AT PRESENTATION                       | OPEN PRIMARY REPAIR                                                           | ACUTE                          |
| 2010 | Bathla   | 2  | 10 | CT                        | Large defect sized hernias in both patients repaired with extraperitoneal PTFE mesh                                               | 100 | -        | AT PRESENTATION (1)<br><br>MISSED (1) | Combined LAP and open MESH repair                                             | ELECTIVE                       |
| 2011 | Aladeen  | 1  | 8  | CT                        | Stable patient presenting for late repair of 4cm LFH                                                                              | -   | INFERIOR | MISSED                                | LAP MESH                                                                      | ELECTIVE                       |
| 2011 | Ho       | 1  | 10 | CT                        | Stable late presentation: Repaired with mesh anchored to iliac crest inferiorly                                                   | -   | INFERIOR | MISSED                                | LAP MESH                                                                      | ELECTIVE                       |
| 2011 | Links    | 1  | 10 | CT                        | Stable late presentation: Repaired with mesh anchored to iliac crest                                                              | -   | INFERIOR | MISSED                                | LAP MESH                                                                      | ELECTIVE                       |

|             |                 |          |          |                             |                                                                                                                                                                                                                                                                                                                                |     |                              |                 |                                              |                           |
|-------------|-----------------|----------|----------|-----------------------------|--------------------------------------------------------------------------------------------------------------------------------------------------------------------------------------------------------------------------------------------------------------------------------------------------------------------------------|-----|------------------------------|-----------------|----------------------------------------------|---------------------------|
|             |                 |          |          |                             | inferiorly                                                                                                                                                                                                                                                                                                                     |     |                              |                 |                                              |                           |
| 2012        | Jayant          | 1        | 10       | CT                          | Stable late presentation of large 25cm hernia – Repaired with overlay propylene mesh                                                                                                                                                                                                                                           | -   | INFERIOR                     | MISSED          | OPEN MESH REPAIR                             | ELECTIVE                  |
| 2012        | Kim             | 1        | 10       | CT                          | Initial expectant management due to renal injury; elective mesh repair when risk of further injury was low                                                                                                                                                                                                                     | -   | INFERIOR                     |                 | OPEN MESH REPAIR                             | ELECTIVE                  |
| 2012        | Martin          | 1        | 10       | CT                          | -                                                                                                                                                                                                                                                                                                                              | 100 | SUPERIOR                     | AT PRESENTATION | OPEN MESH REPAIR                             | ELECTIVE                  |
| <b>2012</b> | <b>Phillips</b> | <b>3</b> | <b>8</b> | <b>6</b>                    | -                                                                                                                                                                                                                                                                                                                              | -   | -                            | -               | <b>OPEN MESH REPAIR (BONE ANCHORED IN 3)</b> | -                         |
| 2012        | Shiber          | 1        | 8        | CT                          | Asymptomatic patient. Followed up with serial examinations                                                                                                                                                                                                                                                                     |     | -                            | AT PRESENTATION | -                                            | CONSERVATIVE              |
| 2013        | Mellnick        | 21       | 6        | CT                          | -                                                                                                                                                                                                                                                                                                                              | -   | -                            | -               | -                                            | -                         |
| 2014        | Ford            | 1        | 6        | CT                          | -                                                                                                                                                                                                                                                                                                                              | -   | -                            | -               | -                                            | -                         |
| 2014        | Saboo           | 1        | 8        | CT                          | Hemodynamically stable. Primary open repair due to intact lack of tissue loss.                                                                                                                                                                                                                                                 | -   | INFERIOR                     | AT PRESENTATION | OPEN PRIMARY                                 | ACUTE                     |
| 2015        | Chan            | 4        | 10       | CT                          | <ol style="list-style-type: none"> <li>1. Delayed open repair with extraperitoneal mesh placement; large defect (including x1 diffuse type), no risk of abdominal contamination; significant tissue loss – In 3 patients</li> <li>2. Hemodynamically stable; elective laparoscopic repair with extraperitoneal mesh</li> </ol> | -   | INFERIOR (4)<br>SUPERIOR (1) | AT PRESENTATION | OPEN MESH (3)<br>LAP MESH (1)                | ACUTE (1)<br>ELECTIVE (3) |
| 2015        | Singh           | 1        | 10       | INTRAOPERATIVE CONFIRMATION | Significant abdominal contamination – Open repair without mesh                                                                                                                                                                                                                                                                 | -   | -                            | AT PRESENTATION | OPEN PRIMARY REPAIR                          | ACUTE                     |

|      |          |    |    |    |                                                                                                                            |   |          |                 |                                                                                            |          |
|------|----------|----|----|----|----------------------------------------------------------------------------------------------------------------------------|---|----------|-----------------|--------------------------------------------------------------------------------------------|----------|
| 2015 | Sun      | 1  | 6  | CT | -                                                                                                                          | - | -        | -               | -                                                                                          | -        |
| 2016 | Coleman  | 27 | 10 | CT | -                                                                                                                          | - | -        | -               | -                                                                                          | -        |
| 2017 | Extein   | 5  | 10 | CT | -                                                                                                                          | - | -        | -               | -                                                                                          | -        |
| 2017 | Kaminski | 1  | 10 | CT | Hemodynamically stable repaired electively with extraperitoneal mesh placement                                             | - | -        | AT PRESENTATION | LAP MESH                                                                                   | ELECTIVE |
| 2017 | Phillips | 1  | 10 | CT | Strangulated and perforated bowel, repaired with open approach with extraperitoneal mesh following ex-lap                  | - | INFERIOR | MISSED          | OPEN MESH REPAIR                                                                           | ELECTIVE |
| 2018 | Park     | 9  | 8  | CT | -                                                                                                                          | - | -        |                 | OPEN MESH REPAIR (4)<br>LAP MESH REPAIR (3)<br>OPEN PRIMARY REPAIR (1)<br>CONSERVATIVE (1) | -        |
| 2018 | Roham    | 1  | 8  | CT | Delayed repair due to initial bladder injury. Extraperitoneal mesh repair when risk of contamination is low                | - | INFERIOR | AT PRESENTATION | OPEN MESH REPAIR (BONE ANCHORED)                                                           | ELECTIVE |
| 2019 | Clements | 1  | 8  | CT | Mesh free repair; significant risk of contamination due to urine leakage – novel tension repair using bone anchored suture | - | -        | AT PRESENTATION | OPEN REPAIR (BONE ANCHORED)                                                                | ACUTE    |
| 2019 | Lee      | 1  | 8  | CT | Hemodynamically stable, late presentation; repaired with lightweight composite mesh                                        |   | -        | AT PRESENTATION | LAP MESH                                                                                   | ACUTE    |
| 2020 | Nguyen   | 1  | 8  | CT | Large 8.5cm defect hernia repaired with extraperitoneal synthetic mesh placement                                           | - | -        | AT PRESENTATION | OPEN MESH REPAIR (BONE ANCHORED)                                                           | ACUTE    |
| 2020 | Ghezala  | 1  | 8  | CT | -                                                                                                                          | - | INFERIOR | AT PRESENTATION | OPEN MESH REPAIR (BONE ANCHORED)                                                           | ACUTE    |

|      |             |   |    |     |                                                                                                                           |       |          |                 |                                             |                           |
|------|-------------|---|----|-----|---------------------------------------------------------------------------------------------------------------------------|-------|----------|-----------------|---------------------------------------------|---------------------------|
| 2020 | Kearney     | 4 | 10 | CT  | -                                                                                                                         |       |          |                 |                                             |                           |
| 2020 | Muriel      | 1 | 8  | CT  | Delayed repair with extraperitoneal synthetic mesh placement                                                              | -     | -        | MISSED          | OPEN MESH REPAIR (BONE ANCHORED)            | ELECTIVE                  |
| 2020 | Kearney     | 4 | 10 | CT  | -                                                                                                                         | -     | -        | -               | -                                           | -                         |
| 2021 | Shen        | 7 | 10 | CT  | -                                                                                                                         | -     | -        | -               | -                                           | -                         |
| 2022 | Nguyen      | 1 | 8  | CT  |                                                                                                                           | -     | INFERIOR | MISSED          | CONSERVATIVE                                | NA                        |
| 2022 | Baig        | 1 | 8  | CT  |                                                                                                                           | -     | INFERIOR | AT PRESENTATION | OPEN MESH REPAIR                            | ACUTE                     |
| 2022 | Vagholkar   | 1 | 8  | CT  |                                                                                                                           | -     | DIFFUSE  | MISSED          | OPEN MESH REPAIR (BONE ANCHORED)            | ELECTIVE                  |
| 2023 | Leiva       | 3 | 10 | CT  | Repair in pediatric population                                                                                            | 66.7% | -        | AT PRESENTATION | OPEN PRIMARY REPAIR                         | ACUTE (2)<br>ELECTIVE (1) |
| 2023 | Hefny       | 2 | 10 | CT  | 1. Large defect but refused surgery – nonoperative management<br>2. Significant bowel contamination – Open primary repair | -     | -        | AT PRESENTATION | OPEN PRIMARY REPAIR (1)<br>CONSERVATIVE (1) | ELECTIVE (1)<br>NA (1)    |
| 2023 | Munoz-Munoz | 1 | 8  | USS | Hemodynamically stable, repaired with polypropylene mesh                                                                  | -     | INFERIOR | MISSED          | OPEN MESH REPAIR                            | ELECTIVE                  |
| 2023 | Heidorn     | 1 | 8  | CT  | Large hernia repair with extraperitoneal (retrorectus) mesh; Hemodynamically stable and low risk of contamination         | -     | INFERIOR | AT PRESENTATION | OPEN MESH REPAIR                            | ACUTE                     |
| 2023 | Alharmoodi  | 3 | 10 | CT  | Large hernia repair with extraperitoneal synthetic mesh; Hemodynamically stable and low risk of contamination             | -     | -        | AT PRESENTATION | OPEN MESH (2)<br>NON-OPERATIVE (1)          | ELECTIVE                  |
